# Supplementary material for: Colophonium-related Allergic Contact Dermatitis Caused by Medical Adhesive Tape Used to Prevent Skin Lesions in Soldiers
Source: PubMed Central journal article supplement — Acta Derm Venereol. 2023 Dec 7;103:18428. doi: 10.2340/actadv.v103.18428 (PMC10719863; doi:10.2340/actadv.v103.18428), 2023-12-07
Supplement: ActaDV-103-18428-s1.pdf [file ActaDV-103-18428-s1.pdf]

Supplementary material has been published as submitted. It has not been copyedited, typeset or checked for scientific content by Acta Dermato-Venereologica

Table SI Results of the patch test with different adhesive tapes in 26 conscripts with foot dermatitis

| ID                 | A1  |     | A2  |     | A3  |     | B   |     | C  |    | D  |    | E  |    |
|--------------------|-----|-----|-----|-----|-----|-----|-----|-----|----|----|----|----|----|----|
|                    | D4  | D7  | D4  | D7  | D4  | D7  | D4  | D7  | D4 | D7 | D4 | D7 | D4 | D7 |
| 1                  | +   | ND  | -   | ND  | -   | ND  | +   | ND  | -  | ND | -  | ND | -  | ND |
| 2                  | +?  | +?  | -   | -   | -   | -   | -   | +?  | -  | -  | -  | +? | -  | -  |
| 3                  | -   | +?  | -   | -   | -   | -   | -   | -   | -  | -  | -  | -  | -  | -  |
| 4                  | -   | ND  | -   | ND  | -   | ND  | -   | ND  | -  | ND | -  | ND | -  | ND |
| 5                  | -   | -   | -   | -   | -   | -   | -   | -   | -  | -  | -  | -  | -  | -  |
| 6                  | ++  | +++ | ++  | +   | +   | +?  | +   | ++  | -  | -  | -  | -  | -  | -  |
| 7                  | ++  | +++ | +   | +   | +   | ++  | ++  | +   | -  | +? | -  | -  | -  | -  |
| 8                  | +++ | +++ | +++ | +   | +++ | +   | +++ | +++ | +  | +? | -  | -  | -  | -  |
| 9                  | -   | -   | -   | -   | -   | -   | -   | -   | -  | -  | -  | -  | -  | -  |
| 10                 | +++ | +++ | +++ | +++ | ++  | ++  | +++ | +++ | -  | -  | -  | -  | -  | -  |
| 11                 | +   | +++ | -   | +?  | -   | +?  | +   | ++  | -  | -  | -  | -  | +? | -  |
| 12                 | +++ | +++ | ++  | +   | +++ | ++  | +++ | ++  | -  | -  | -  | -  | -  | +? |
| 13                 | ++  | ++  | +?  | +?  | -   | -   | +   | +?  | +? | +? | -  | -  | -  | -  |
| 14                 | +++ | +++ | +   | +   | +   | +   | +++ | +++ | +? | -  | -  | -  | -  | -  |
| 15                 | ++  | ND  | +   | ND  | +   | ND  | ++  | ND  | -  | ND | -  | ND | -  | ND |
| 16                 | +++ | +++ | ++  | +++ | ++  | +++ | +++ | +++ | ++ | ++ | -  | -  | -  | -  |
| 17                 | ++  | +++ | +   | ++  | +   | +?  | ++  | +++ | +? | -  | -  | -  | -  | -  |
| 18                 | ++  | +++ | +++ | +++ | ++  | ++  | +++ | +++ | ++ | ++ | -  | -  | -  | -  |
| 19                 | +++ | +++ | ++  | +++ | ++  | ++  | ++  | ND  | -  | ND | -  | ND | -  | ND |
| 20                 | -   | ND  | -   | ND  | -   | ND  | -   | ND  | -  | ND | -  | ND | -  | ND |
| 21                 | +++ | +++ | ++  | ++  | ++  | ++  | +?  | -   | -  | -  | -  | -  | -  | -  |
| 22                 | +++ | +++ | +++ | ++  | +++ | ++  | +++ | +++ | ++ | +? | -  | -  | -  | -  |
| 23                 | +   | ++  | -   | +?  | -   | +?  | +?  | +   | +? | +? | +? | +? | -  | +? |
| 24                 | -   | -   | +   | +?  | +?  | +?  | +   | -   | +? | -  | -  | -  | -  | -  |
| 25                 | ++  | +++ | +   | ++  | +?  | +   | ++  | +++ | +? | +? | -  | -  | -  | -  |
| 26                 | +?  | +?  | -   | -   | -   | -   | +?  | -   | +? | +? | -  | -  | -  | -  |
| Total <sup>a</sup> | 18  | 16  | 15  | 13  | 13  | 11  | 17  | 13  | 4  | 2  | 0  | 0  | 0  | 0  |

ID = Patient number ; A1—A3 = Optiplaste®-C from the batch used by the conscripts, test as is (A1), test with acetone extract 100% (A2) and test with acetone extract 20% (A3) ; B = Optiplaste-C from a batch not used by the conscripts, test as is ; C = Strappal®, test as is ; D = Adapta™, test as is ; E = Fortelast®, test as is ; D4 = test reading day 4 based on clinical examination of test area ; D7 = test reading day 7 based on photo of test area ; ND = no data due to no photo of test area D7 ;

<sup>a</sup>) Total number of patients with a positive test

Table SII. Results of patch test with colophonium and colophonium-related substances in 26 conscripts with foot dermatitis

| ID                 | Colophonium<br>20% pet |     | Colophonium<br>60% Softisan |     | Abietic acid<br>10% pet |     | Hydroabietyl alcohol<br>10% pet |     |
|--------------------|------------------------|-----|-----------------------------|-----|-------------------------|-----|---------------------------------|-----|
|                    | D4                     | D7  | D4                          | D7  | D4                      | D7  | D4                              | D7  |
| 1                  | -                      | ND  | +                           | ND  | -                       | ND  | -                               | ND  |
| 2                  | -                      | -   | -                           | -   | -                       | -   | -                               | +?  |
| 3                  | -                      | -   | -                           | -   | -                       | -   | -                               | -   |
| 4                  | -                      | ND  | -                           | ND  | -                       | ND  | -                               | ND  |
| 5                  | -                      | -   | -                           | -   | -                       | -   | -                               | -   |
| 6                  | ++                     | +   | ++                          | +++ | +                       | +?  | +?                              | +?  |
| 7                  | ++                     | +   | ++                          | ++  | ++                      | +++ | +                               | +++ |
| 8                  | ++                     | +++ | +++                         | ++  | +                       | +   | ++                              | +   |
| 9                  | -                      | -   | -                           | -   | -                       | -   | -                               | -   |
| 10                 | ++                     | ++  | ++                          | ++  | -                       | -   | +?                              | +?  |
| 11                 | -                      | -   | -                           | +   | -                       | -   | -                               | -   |
| 12                 | +++                    | ++  | +++                         | ++  | +?                      | +?  | +                               | +   |
| 13                 | -                      | -   | -                           | +?  | +?                      | +?  | +?                              | +?  |
| 14                 | ++                     | ++  | +++                         | +++ | +?                      | +?  | -                               | -   |
| 15                 | +                      | ND  | ++                          | ND  | +                       | ND  | +                               | ND  |
| 16                 | +++                    | +++ | +++                         | +++ | +                       | ++  | ++                              | +++ |
| 17                 | +                      | +   | ++                          | +++ | -                       | -   | +                               | +   |
| 18                 | ++                     | ++  | +++                         | +++ | +?                      | +   | ++                              | +   |
| 19                 | +++                    | +++ | +++                         | NTR | -                       | -   | -                               | -   |
| 20                 | -                      | ND  | -                           | ND  | -                       | ND  | -                               | ND  |
| 21                 | ++                     | +   | +?                          | +?  | +?                      | +?  | +                               | +   |
| 22                 | +++                    | +   | ++                          | ++  | ++                      | +   | ++                              | +   |
| 23                 | -                      | +?  | +?                          | +?  | -                       | -   | -                               | -   |
| 24                 | +?                     | -   | -                           | +?  | -                       | -   | -                               | -   |
| 25                 | -                      | +?  | +                           | +   | +?                      | +?  | +?                              | +?  |
| 26                 | -                      | -   | -                           | -   | -                       | +?  | -                               | +?  |
| Total <sup>a</sup> | 13                     | 12  | 14                          | 12  | 6                       | 5   | 9                               | 8   |

ID = Patient number ; pet = petrolatum ; D4 = test reading day 4 based on clinical examination of test area ; D7 = test reading day 7 based on photo of test area ; ND) no data due to no photo of test area D7 ; NTR = no test reading as test area treated with topical corticosteroid due to extremely strong reaction at D4.

<sup>a</sup>) Total number of patients with a positive test
